# Supplementary material for: The multiple linear regression modelling algorithm ABSOLUT v1.0 for weather-based crop yield prediction and its application to Germany at district level
Source: Copernicus journal article supplement (doi:10.5194/gmd-2021-21), 2021-03-15

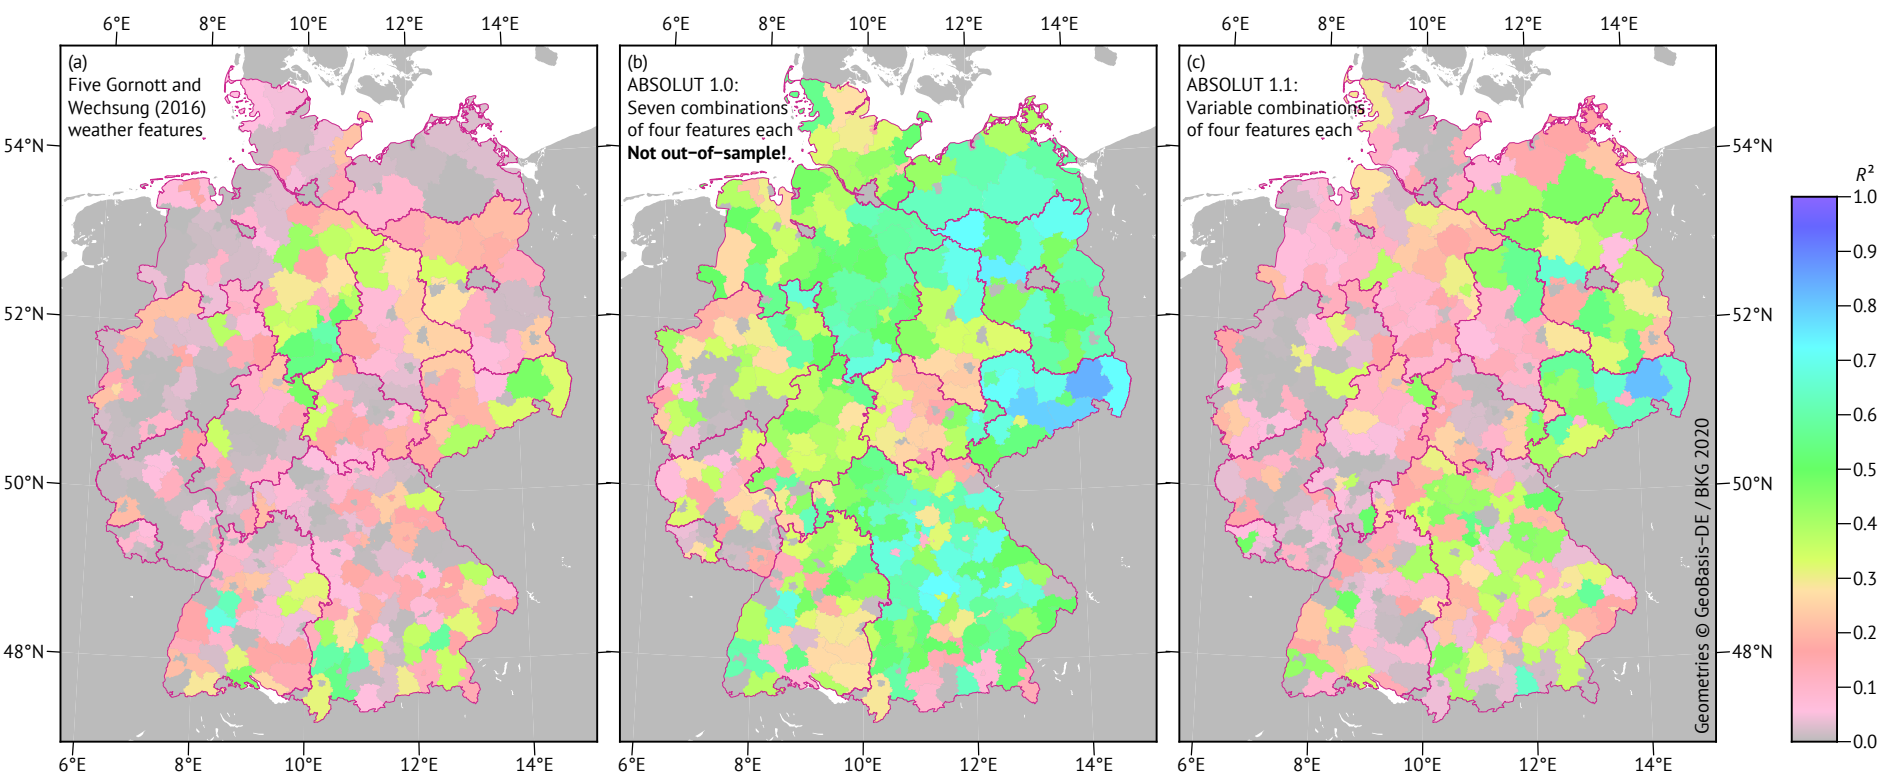

Supplement: Supplementary file [file gmd-2021-21-AC3-supplement.pdf]
